# Supplementary material for: QTL mapping using an ultra-high-density SNP map reveals a major locus for grain yield in an elite rice restorer R998
Source: PubMed Central journal article supplement (PMC5589899; doi:10.1038/s41598-017-10666-7), 2017-09-07
Supplement: 41598_2017_10666_MOESM1_ESM.pdf [file 41598_2017_10666_MOESM1_ESM.pdf]

# **QTL mapping using an ultra-high-density SNP map reveals a major locus for grain yield in an elite rice restorer R998**

Manshan Zhu<sup>1,2+</sup> Dilin Liu<sup>1,2+</sup> Wuge Liu<sup>1,2</sup> Dan Li<sup>1,2</sup> Yilong Liao<sup>1,2</sup> Jinhua Li<sup>1,2</sup>  
Chongyun Fu<sup>1,2</sup> Fuhong Fu<sup>1,2</sup> Huijun Huang<sup>1,2</sup> Xueqin Zeng<sup>1,2</sup> Xiaozhi Ma<sup>1,2</sup> Feng  
Wang<sup>1,2</sup> \*

**Table S1. List of InDel markers developed for *qGY8***

| Primer | Forward                | Reverse                | Genotype score (bp, R998 vs Francis) | Indel position |
|--------|------------------------|------------------------|--------------------------------------|----------------|
| N2     | CTGGCTTACCCTCAAAGCAT   | AGCTGGAGACGATTGCTTG    | -24                                  | 16467312       |
| N12    | TCCCCAACAATTGATTCTC    | TTTTGATTGTTGATTCGAGCTT | 22                                   | 16471541       |
| N49    | ACCCTACGGTACACCCCTCT   | CAACCCAGCTAGGGCTTACA   | -44                                  | 16491993       |
| N104   | TTCATTATCCCGCGCATTAC   | GAGTGGGAAGCGACATCGT    | 36                                   | 16533954       |
| N110   | CCGAAGTGATGATGGGAGAG   | CCTCCGTTCCCTACTTCAA    | -30                                  | 16542634       |
| N153   | GCGCCATAAATATAGCTACACC | AACGGTGGAGGATGAAAGGT   | -20                                  | 16559094       |
| N184   | GATGTTGTCCGCAGAGATGA   | CTCCTCGACAGCATCCACTC   | -66                                  | 16587529       |

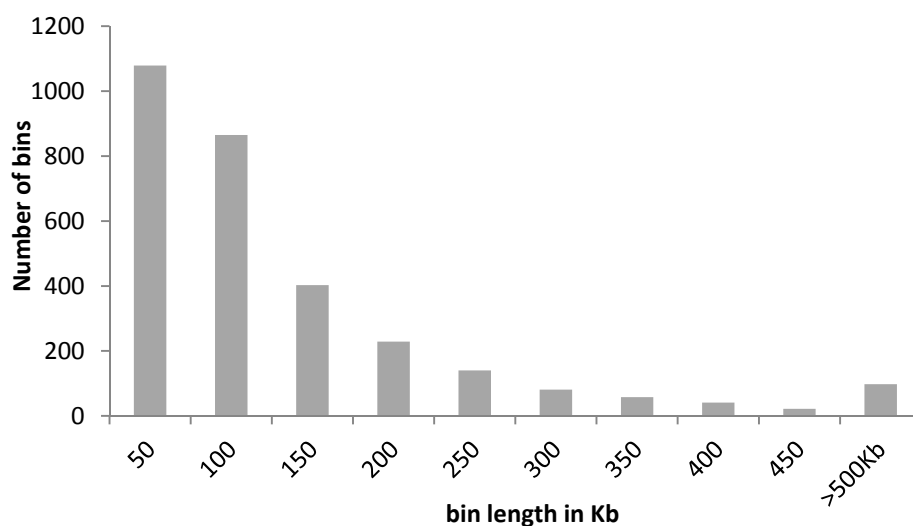**Figure S1. Frequency distribution of bin marker length.**

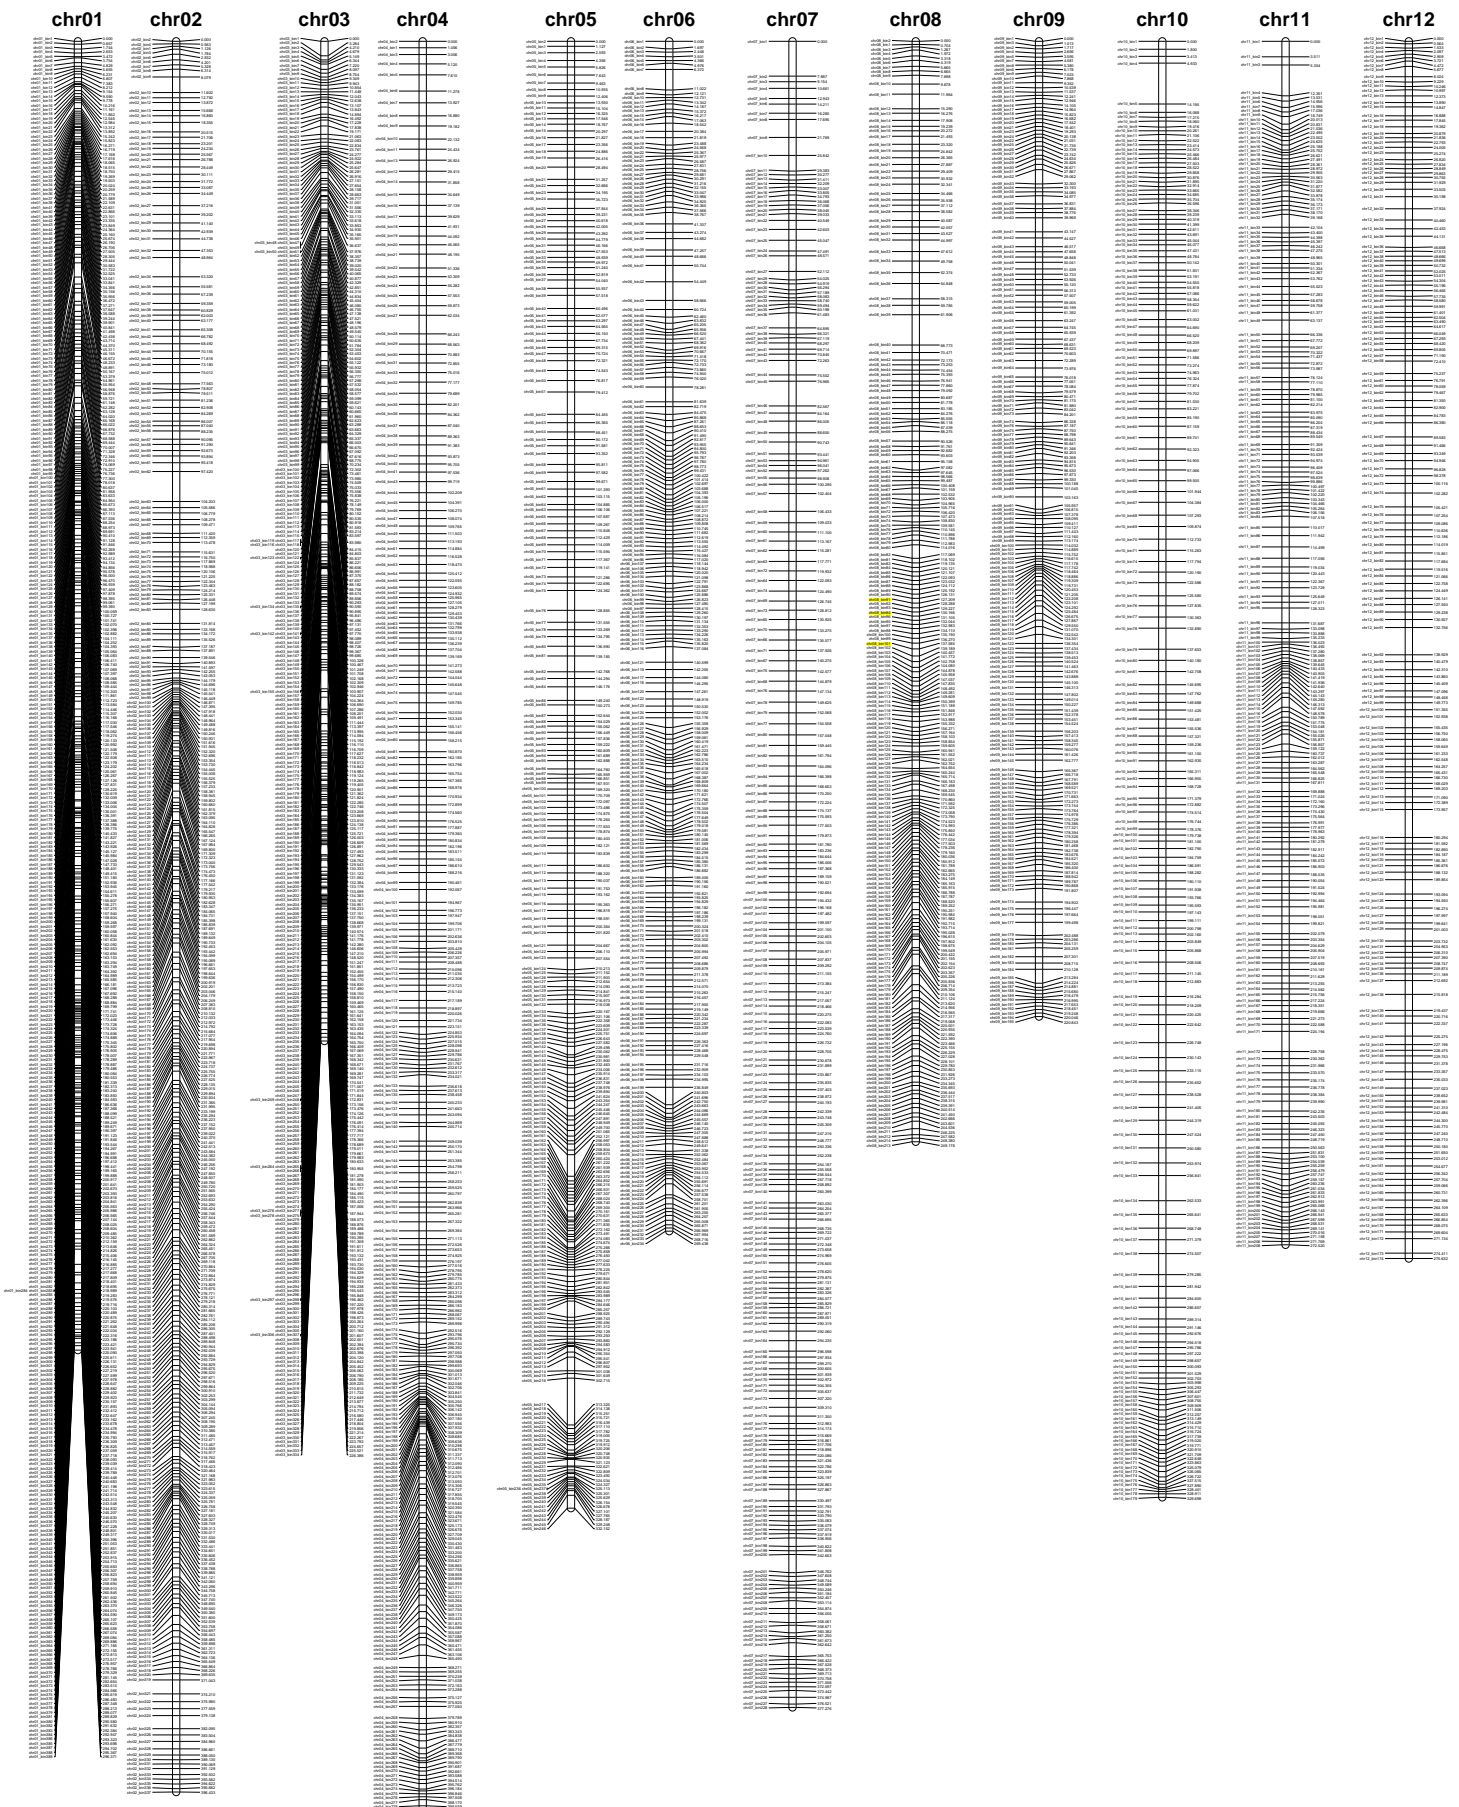

Figure S2. Genetic map constructed from the RILs population of R998 x Francis.

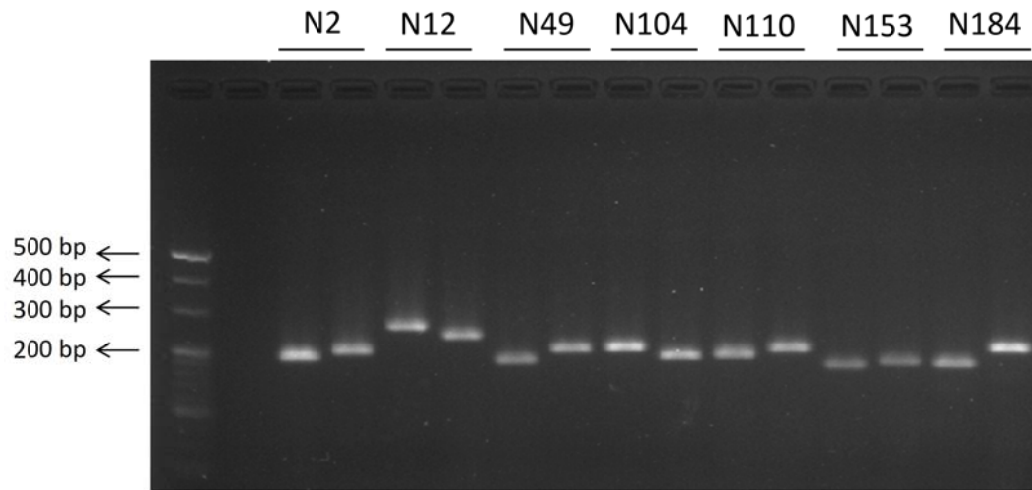

Figure S3. Full-length gel for Fig. 6
